# Supplementary material for: Efficient Cross-Coupling of Acetone with Linear Aliphatic Alcohols over Supported Copper on a Fluorite-Type Pr2Zr2O7
Source: MDPI journal article supplement (doi:10.3390/catal12101279), 2022-10-20
Supplement: s1 [file s1]

## Supplementary Information

### Efficient cross-coupling of acetone with linear aliphatic alcohols over supported copper on a fluorite-type $\text{Pr}_2\text{Zr}_2\text{O}_7$

Suhyun Lim <sup>1,†</sup>, Minseok Kim <sup>1,†</sup>, Sang Hyeok Ko <sup>1</sup>, Jae-Hong Lee <sup>1</sup>, Joon Hyun Baik <sup>2</sup>, and Young-Woong Suh <sup>1,3,\*</sup>

<sup>1</sup> Department of Chemical Engineering, Hanyang University, Seoul 04763, Korea

<sup>2</sup> Department of Chemical and Biological Engineering, Sookmyung Women's University, Seoul 04310, Korea

<sup>3</sup> Research Institute of Industrial Science, Hanyang University, Seoul 04763, Republic of Korea

\*Corresponding: ywsuh@hanyang.ac.kr

<sup>†</sup>These authors contributed equally to this work.

**Table S1.** Conversion of butanol measured under different reaction conditions, where the reactant was 20 g with the butanol/acetone mole ratio of 2 and the catalyst used was 1 g.

| Catalyst                                          | Nominal Cu loading [wt%] | Temp. [°C] | Time [h] | Water content [wt%] | Number of cycle | Butanol conversion [mol%] | Associated figure |
|---------------------------------------------------|--------------------------|------------|----------|---------------------|-----------------|---------------------------|-------------------|
| Cu/ <i>m</i> -ZrO <sub>2</sub>                    | 5                        | 240        | 20       | 0                   | -               | 56.2                      | Fig. 4            |
| Cu/PrO <sub>1.83</sub>                            | 5                        |            |          |                     |                 | 91.0                      | Fig. 4            |
| Cu/Pr <sub>2</sub> Zr <sub>2</sub> O <sub>7</sub> | 5                        |            |          |                     |                 | 82.6                      | Fig. 4            |
|                                                   | 1                        |            |          |                     |                 | 60.2                      | Fig. 6            |
|                                                   | 3                        |            |          |                     |                 | 72.2                      | Fig. 6            |
|                                                   | 5                        |            | 3        |                     |                 | 40.7                      | Fig. 8            |
|                                                   |                          |            | 6        |                     |                 | 54.4                      | Fig. 8            |
|                                                   |                          |            | 12       |                     |                 | 74.0                      | Fig. 8            |
|                                                   |                          |            | 24       |                     |                 | 82.4                      | Fig. 8            |
|                                                   |                          |            | 20       | 3                   |                 | 76.9                      | Fig. 9            |
|                                                   |                          |            |          | 5                   |                 | 73.1                      | Fig. 9            |
|                                                   |                          |            |          | 7                   |                 | 66.2                      | Fig. 9            |
|                                                   |                          |            |          | 10                  |                 | 58.4                      | Fig. 9            |
|                                                   | 200                      | 20         | 0        | 1 <sup>st</sup>     | 50.9            | Fig. 10a                  |                   |
|                                                   |                          |            |          | 2 <sup>nd</sup>     | 48.6            | Fig. 10a                  |                   |
|                                                   |                          |            |          | 3 <sup>rd</sup>     | 50.0            | Fig. 10a                  |                   |
|                                                   |                          |            |          | 2 <sup>nd</sup>     | 79.3            | Fig. 10b                  |                   |
|                                                   |                          |            |          | 3 <sup>rd</sup>     | 56.4            | Fig. 10b                  |                   |
|                                                   |                          |            |          | 4 <sup>th</sup>     | 73.4            | Fig. 10b                  |                   |

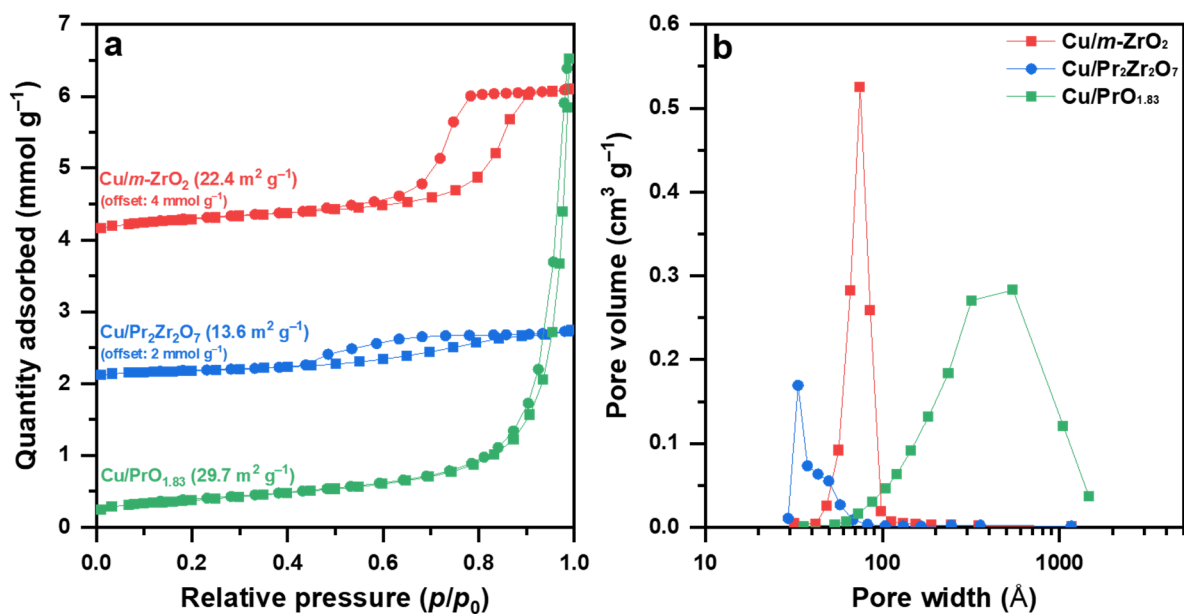

**Figure S1.** N<sub>2</sub> physisorption results of Cu/*m*-ZrO<sub>2</sub>, Cu/PrO<sub>1.83</sub>, and Cu/Pr<sub>2</sub>Zr<sub>2</sub>O<sub>7</sub> listed in Table 1: (a) BET isotherms and (b) pore size distribution curves.

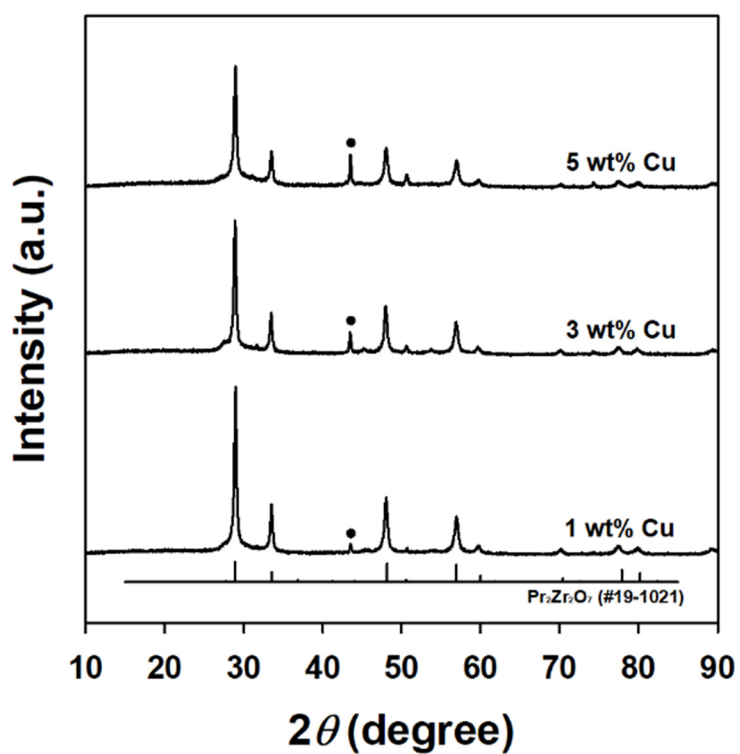

**Figure S2.** XRD patterns of the reduced Cu/Pr<sub>2</sub>Zr<sub>2</sub>O<sub>7</sub> of 1, 3, and 5 wt% Cu. The diffraction peak of Cu (111) is represented by the square symbol.

**a 1Cu/Pr<sub>2</sub>Zr<sub>2</sub>O<sub>7</sub>**

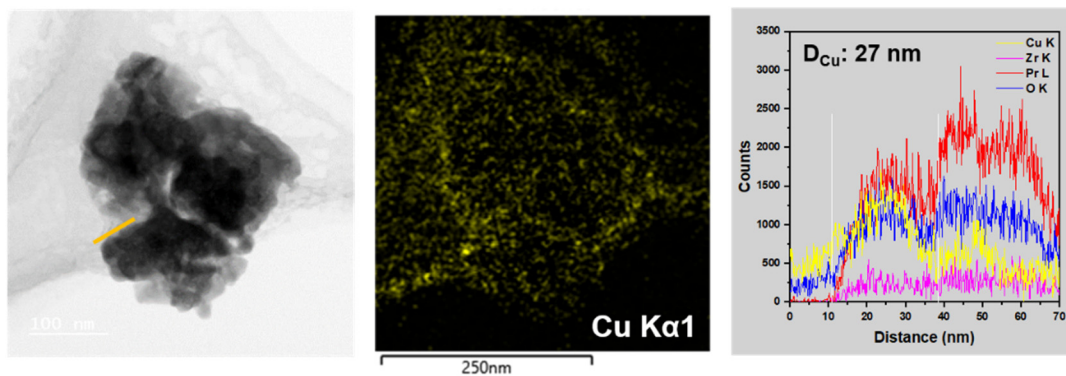

**b 3Cu/Pr<sub>2</sub>Zr<sub>2</sub>O<sub>7</sub>**

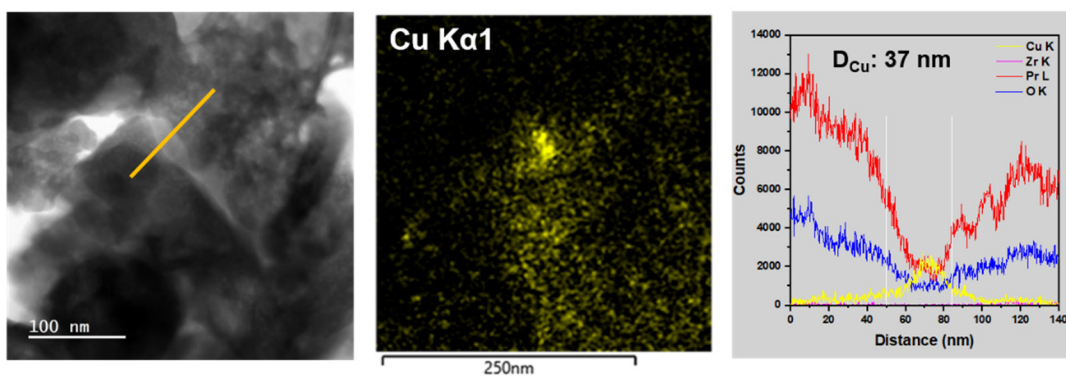

**c 5Cu/Pr<sub>2</sub>Zr<sub>2</sub>O<sub>7</sub>**

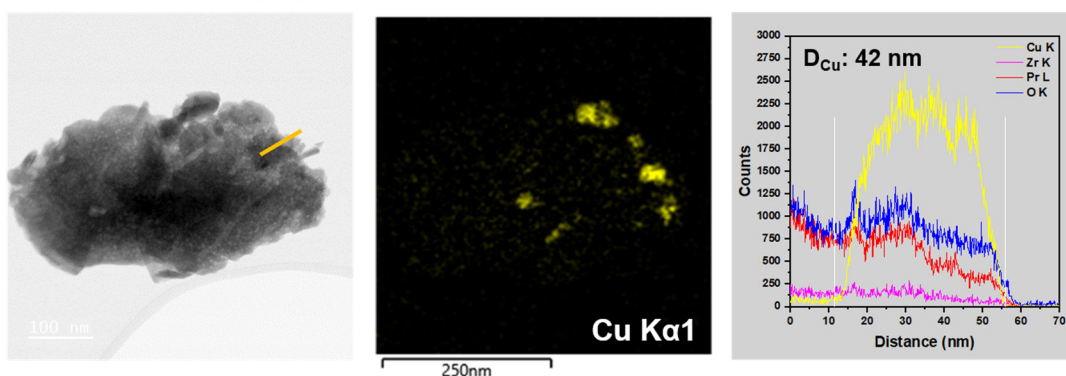

**Figure S3.** TEM images, Cu EDS mapping images, and line scanning results (obtained by tracking the orange line in the first image): (a) 1Cu/Pr<sub>2</sub>Zr<sub>2</sub>O<sub>7</sub>, (b) 3Cu/Pr<sub>2</sub>Zr<sub>2</sub>O<sub>7</sub>, and (c) 5Cu/Pr<sub>2</sub>Zr<sub>2</sub>O<sub>7</sub>.
